# Supplementary material for: Comprehensive assessment of multiple biases in small RNA sequencing reveals significant differences in the performance of widely used methods
Source: PubMed Central journal article supplement (PMC6588940; doi:10.1186/s12864-019-5870-3), 2019-06-21

### miRNA Detection across kits > 10 reads in all triplicates

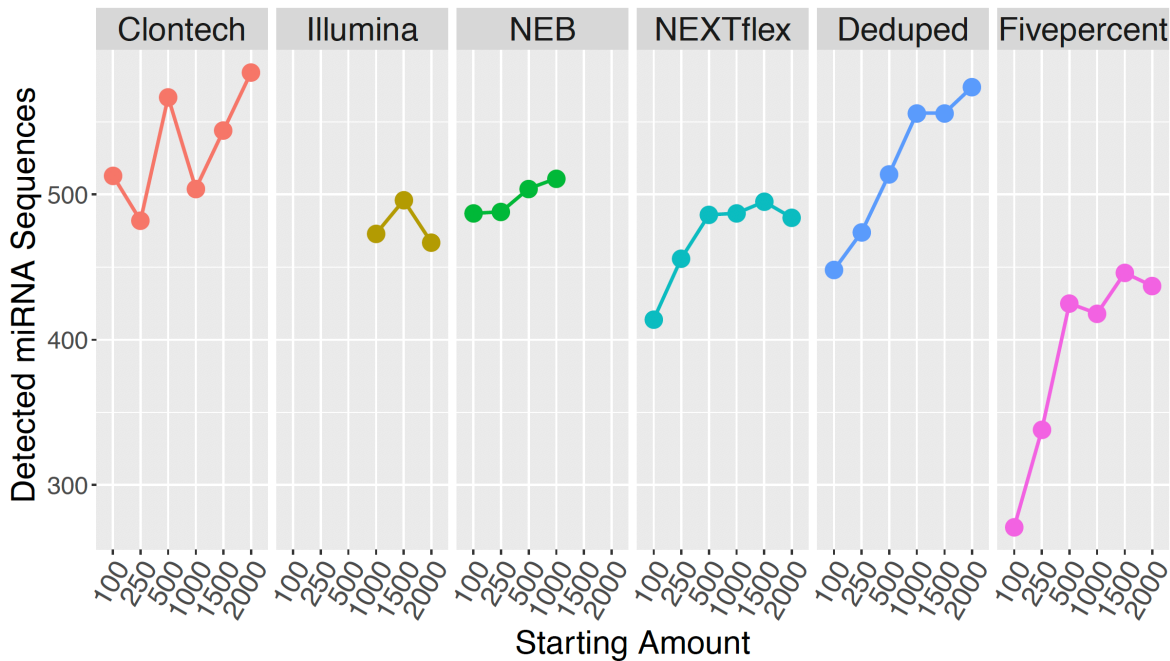

### isomiR Detection across kits > 100 reads in all triplicates

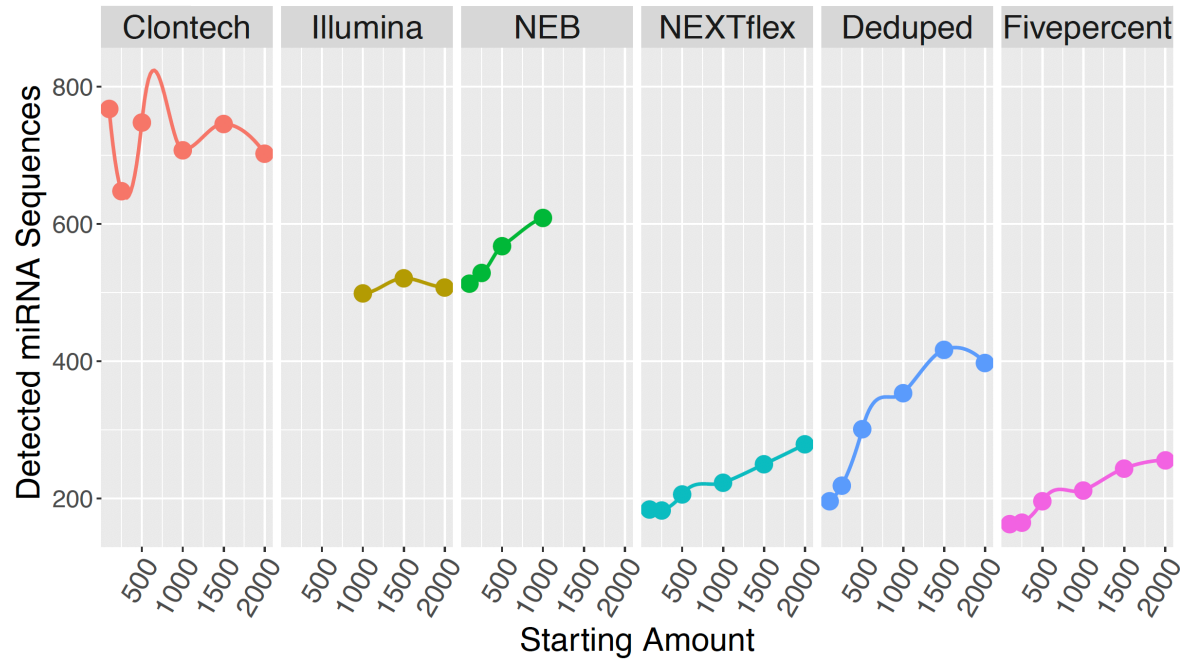

### Inconsistency of miRNA detection among triplicates

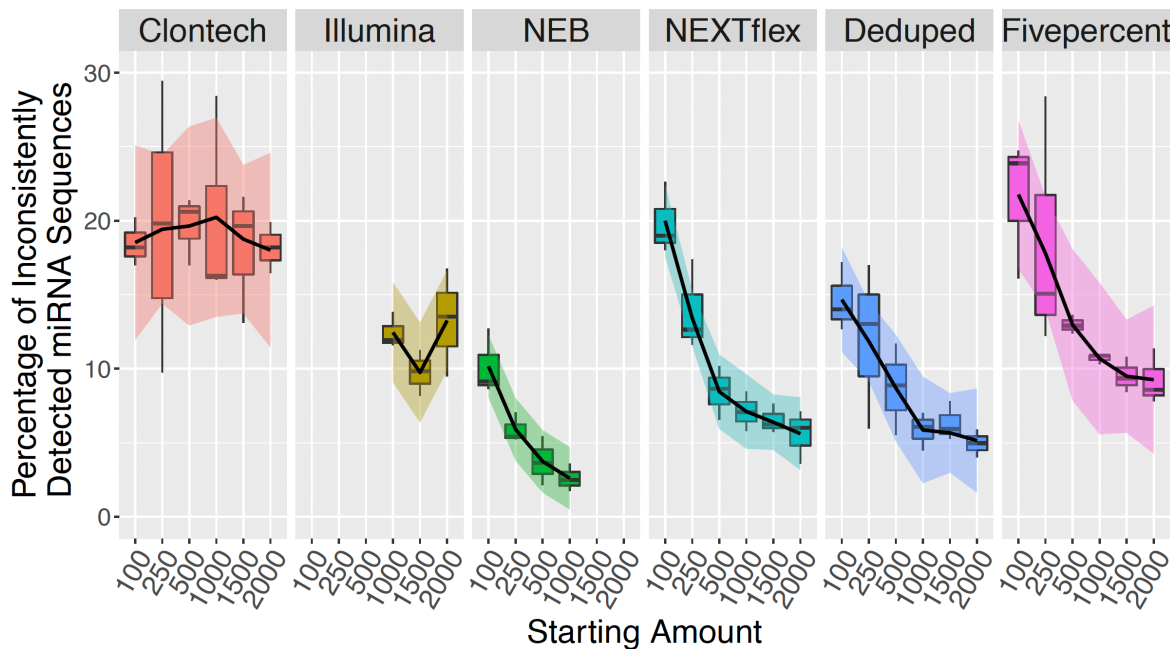

### Inconsistency of isomiR detection among triplicates

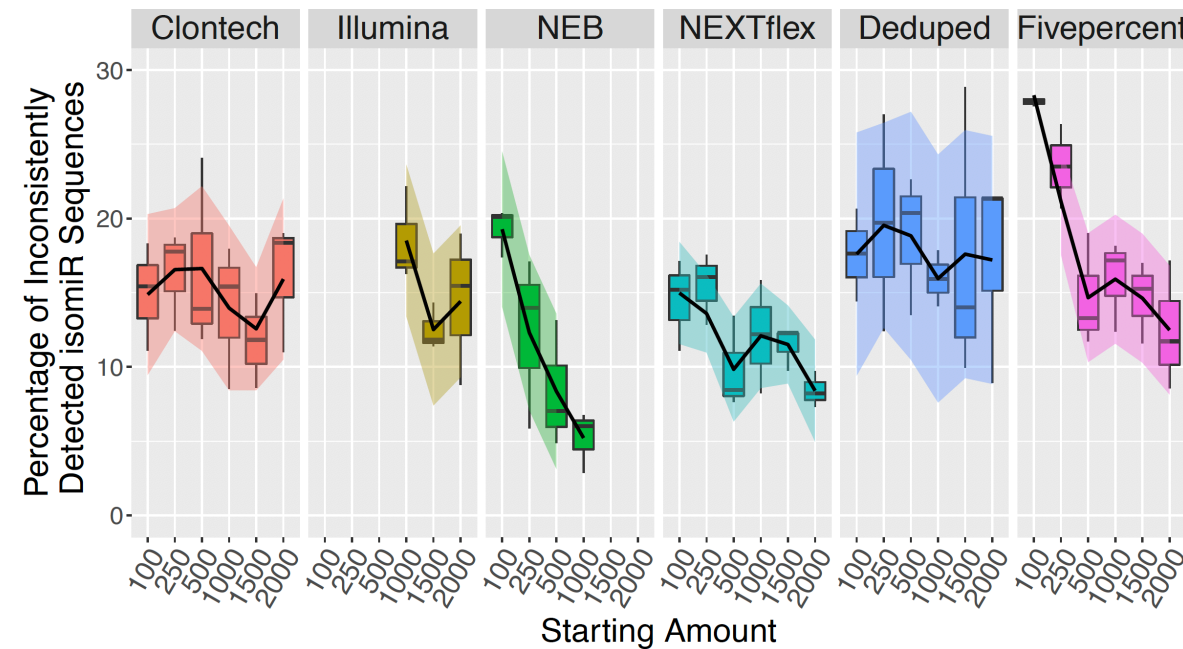

Supplement: 12864_2019_5870_MOESM9_ESM.pdf [file 12864_2019_5870_MOESM9_ESM.pdf]
